# Supplementary material for: Stat3 regulates desmoglein 3 transcription in epithelial keratinocytes
Source: JCI journal article supplement (doi:10.1172/jci.insight.92253), 2017-05-03
Supplement: sd1 [file 1]

## **Stat3 regulates desmoglein 3 transcription in epithelial keratinocytes**

Xuming Mao, Michael Jeffrey T. Cho, Christoph T. Ellebrecht, Eric M. Mukherjee, Aimee S. Payne

Department of Dermatology, University of Pennsylvania, Philadelphia, PA 19104

### **Supplemental Figure Legends**

**Supplemental Figure 1. Stat3 inhibition increases keratinocyte expression of desmoglein 3 (DSG3) as well as other adhesion molecules.** **A.** Treatment of primary human keratinocytes with 25  $\mu$ M Stat3 inhibitor XVIII causes increased protein levels of desmoglein 3 (DSG3), as well as DSG1, DSG2, and E-cadherin, whereas levels of pan-keratin and desmocollin 3 (DSC3) are unchanged to decreased. Levels of phospho-S727 Stat3 (pStat3) and total Stat3 levels are shown for the represented experiment as a control. **B.** Quantitation of representative experiments in part as shown in panel A. The number (n) of independent experiments for each molecule is shown.

**Supplemental Figure 2. Topical Stat3 inhibition protects from pemphigus vulgaris (PV) mAb-induced skin blistering.** **A.** Pathogenic anti-desmoglein (DSG) PV mAb Px43, but not nonpathogenic anti-DSG PV mAb Px44, causes spontaneous suprabasal skin blistering that is inhibited by topical Stat3 inhibition at the gross and histologic levels (**B**, left panels). Direct immunofluorescence (DIF) analysis confirms equal binding of PV mAbs to the keratinocyte cell surface (**B**, right panels). Scale bar=100  $\mu$ m. Results are representative of 2 different experiments.

**A****B**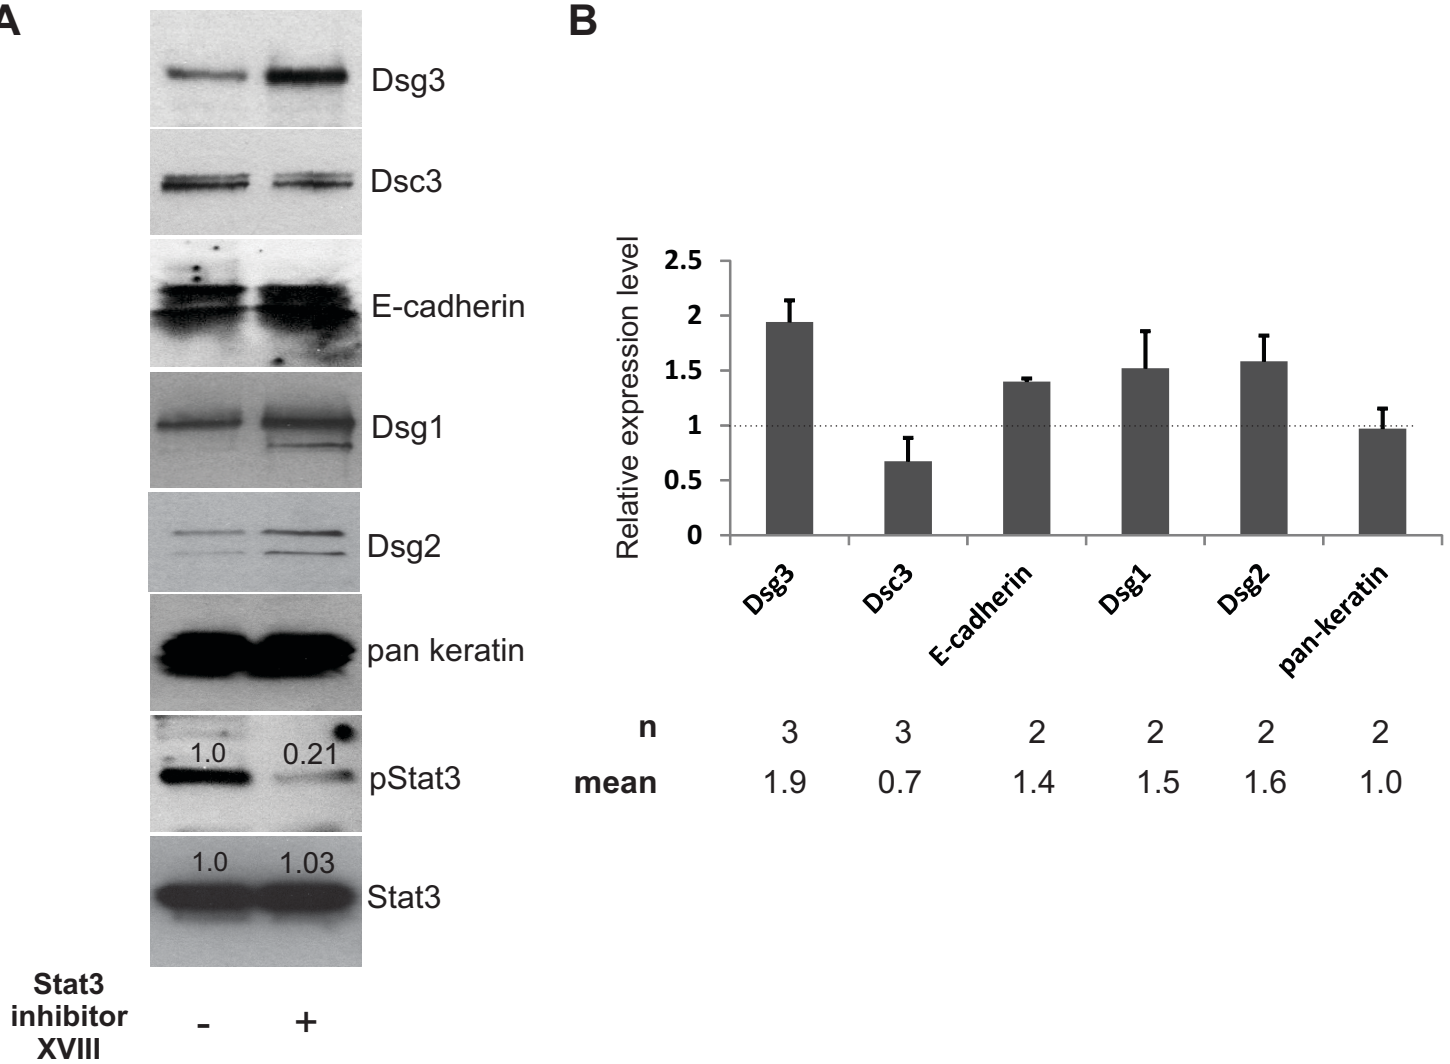

**Supplemental Figure 1. Stat3 inhibition increases keratinocyte expression of desmoglein 3 (DSG3) as well as other adhesion molecules.** **A.** Treatment of primary human keratinocytes with 25  $\mu$ M Stat3 inhibitor XVIII causes increased protein levels of desmoglein 3 (DSG3), as well as DSG1, DSG2, and E-cadherin, whereas levels of pan-keratin and desmocollin 3 (DSC3) are unchanged to decreased. Levels of phospho-S727 Stat3 (pStat3) and total Stat3 levels are shown for the represented experiment as a control. **B.** Quantitation of representative experiments in part as shown in panel A. The number (n) of independent experiments for each molecule is shown.

**A**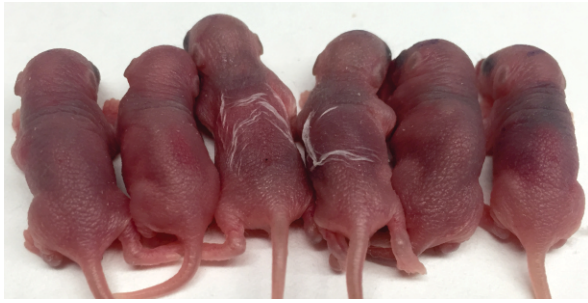

DMSO+PX44

DMSO+PX43

Stat3 inhibitor  
+PX43

**B**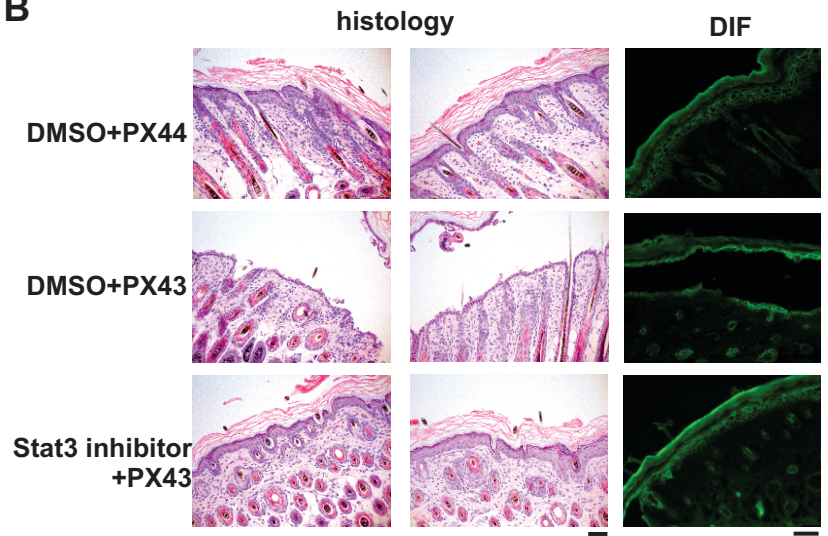

**Supplemental Figure 2. Topical Stat3 inhibition protects from PV mAb-induced skin blistering.**

**A.** Pathogenic anti-Dsg3/1 PV mAb Px43, but not nonpathogenic anti-Dsg3/1 PV mAb Px44, causes spontaneous suprabasal skin blistering that is inhibited by topical Stat3 inhibition at the gross and histologic levels (**B**, left panels). Direct immunofluorescence (DIF) analysis confirms equal binding of PV mAbs to the keratinocyte cell surface (**B**, right panels). Scale bar =100  $\mu$ m. Results are representative of 2 different experiments.
